# Supplementary material for: Molecular Mechanisms of Tungsten Toxicity Differ for Glycine max Depending on Nitrogen Regime
Source: Front Plant Sci. 2019 Apr 2;10:367. doi: 10.3389/fpls.2019.00367 (PMC6454624; doi:10.3389/fpls.2019.00367)
Supplement: Supplementary file 3 [file Table_5.xlsx]

## Sheet: SI Table 5
					N fix							N fed
ORGANISM	Uniprot ID	proteotypic evaluation	Mercator categories	Annotation (UniprotKB/Uniref100)	ztrans LFQ int.							ztrans LFQ int.
					C	W 500	ratio	p-value	BH adj. p-value	sig.		C	W 500	ratio	p-value	BH adj. p-value	sig.
Glycine max	I1KC33		acid and other phosphatases	Purple acid phosphatase	-0.882486	1.06497	0.109176	0.00724753	0.0646971	**		0.640329	-0.822817	5.90426	0.02736	0.700214	*
Glycine max	I1KV12		acid and other phosphatases	Acid phosphatase	-1.34849	1.02879	0.427193	0.00144832	0.0270483	**		0.349682	-0.0299865	1.12281	0.828957	1
Glycine max	P10743		acid and other phosphatases	Stem 31 kDa glycoprotein	-0.714588	1.43047	0.111798	0.00586459	0.0604396	**		-0.0522659	-0.663616	2.90469	0.592583	1
B. japonicum	G7D6M1	x	amino acid metabolism	4-hydroxy-tetrahydrodipicolinate synthase	1.37616	-0.991237	6.21023	0.00548944	0.058357	**		-0.0350745	-0.349851	1.28727	0.929995	1
B. japonicum	G7DFS8	x	amino acid metabolism	2-isopropylmalate synthase	1.49299	-0.634196	2.72075	0.00570729	0.0597536	**		-0.42617	-0.432622	1.00449	0.999999	1
B. japonicum	G7DKX8	x	amino acid metabolism	Beta-ketoadipyl CoA thiolase	1.402	-0.943495	3.2561	0.000109284	0.00656653	***		-0.369059	-0.0894487	0.852345	0.834947	1
Glycine max	I1KZY9		amino acid metabolism	Uncharacterized protein	-1.04375	1.34832	0.387117	0.0208154	0.129794	*		-0.30433	-0.000232134	0.880953	0.963654	1
Glycine max	I1NJA5		amino acid metabolism	2-isopropylmalate synthase 2, chloroplastic	-1.47414	0.67566	0.452025	0.00280774	0.0417236	**		0.238612	0.55987	0.915622	0.880918	1
B. japonicum	G7DDF8	x	amino acid metabolism, secondary metabolism	Acetyl-CoA acetyltransferase	1.22166	-1.22781	4.75271	0.0172561	0.115767	*		0.00665623	-0.00050893	1.00381	0.999999	1
B. japonicum	G7DFF8	x	amino acid metabolism, secondary metabolism	3-isopropylmalate dehydratase small subunit	1.37665	-1.02025	2.91085	0.0161318	0.112006	*		-0.192784	-0.163614	0.986182	0.99996	1
B. japonicum	G7DJV7	x	amino acid metabolism, secondary metabolism	Acetyl CoA synthase	1.41952	-0.930128	4.26077	0.00719749	0.0646971	**		-0.250287	-0.239108	0.992081	0.999997	1
Glycine max	I1KPY5		Biodegradation of Xenobiotics	Lactoylglutathione lyase	-0.951779	1.40929	0.378848	0.000188512	0.00793619	***		-0.269704	-0.187808	0.962843	0.995431	1
Glycine max	I1M2S7	x	Biodegradation of Xenobiotics	Uncharacterized protein	-1.10321	1.2284	0.356578	0.0475963	0.226821	*		-0.427373	0.302188	0.729547	0.747004	1
Glycine max	C6T429	x	cell	Peptidyl-prolyl cis-trans isomerase	-0.951332	1.38387	0.387662	0.00680288	0.0641256	**		-0.424035	-0.00850059	0.828378	0.861635	1
Glycine max	G3E7M9		cell	Annexin	-0.588664	1.49553	0.259296	0.0424076	0.210647	*		-0.506625	-0.400241	0.884118	0.998217	1
B. japonicum	G7D8J9	x	cell	Peptidyl-prolyl cis-trans isomerase	1.47231	-0.707729	4.44309	0.0152192	0.109384	*		-0.522145	-0.24244	0.745365	0.957259	1
B. japonicum	G7DDC9	x	cell	Peptidylprolyl isomerase	1.42136	-0.869383	3.28101	0.0160893	0.112006	*		-0.465137	-0.0868441	0.788286	0.917091	1
Glycine max	I1JAV9		cell wall	Pectinesterase	-1.36815	0.982001	0.186129	0.000124993	0.00694305	***		-0.0182178	0.404365	0.817063	0.608709	1
Glycine max	I1KR53		cell wall	Beta-xylosidase/alpha-L-arabinofuranosidase-like protein	-0.995799	-0.165364	0.499492	0.394061	0.790108			1.38894	-0.227778	2.01249	0.0191331	0.62329	*
Glycine max	C6SYB8	x	stress	Uncharacterized protein	-1.05717	1.01394	0.0637166	0.0352033	0.186457	*		-0.631602	0.674831	0.302471	0.188817	1
B. japonicum	G7D2E8	x	Co-factor and vitamine metabolism	Competence-damage associated protein	1.29811	-1.1388	2.51236	0.0424454	0.210647	*		-0.131436	-0.0278699	0.961956	0.998967	1
Glycine max	C6SVI7		development	Uncharacterized protein	-0.803616	1.2773	0.283466	0.00319999	0.044943	**		-0.789344	0.31566	0.431143	0.0942517	1
Glycine max	I1MCG6		development	Uncharacterized protein	-0.749139	1.36362	0.346056	0.0405708	0.20538	*		-0.749139	0.134661	0.558505	0.526799	1
B. japonicum	G7D6Q4	x	DNA	Transcriptional regulatory protein	-0.28001	-0.834358	2.72234	0.76701	1			1.45288	-0.338509	3.19075	0.0207463	0.62329	*
B. japonicum	G7DE90	x	DNA	Histone	1.47027	-0.761504	8.97331	0.0331035	0.181544	*		-0.294223	-0.414545	1.19194	0.997607	1
B. japonicum	G7DMC4	x	DNA	Two-component response regulator	1.25406	-1.15372	3.76889	0.00715025	0.0646971	**		0.163427	-0.263767	1.24279	0.864959	1
B. japonicum	G7DMW6	x	DNA	LexA repressor	0.793114	-1.43244	3.48231	0.0352137	0.186457	*		0.559145	0.0801858	1.1988	0.881949	1
Glycine max	B1ACD3	x	protease inhibitor	Putative Kunitz trypsin protease inhibitor	-1.02699	1.35061	0.176875	0.00104711	0.0207424	**		0.023621	-0.347238	1.31147	0.82317	1
Glycine max	I1KW53		protease inhibitor	Uncharacterized protein	-0.838555	1.14458	0.311802	0.000656308	0.0167966	***		-0.838555	0.532529	0.395887	0.00677836	0.39032	**
Glycine max	C6T3A2	x	stress	Stress-induced protein SAM22	-0.735617	1.39547	0.00231277	0.0484541	0.230115	*		-0.713225	0.053375	0.0344253	0.663067	1
Glycine max	C7S8D4		stress	Germin-like protein 20	-0.720273	1.40028	0.167626	0.0213242	0.132153	*		-0.720273	0.040262	0.359592	0.561287	1
Glycine max	Q9LLX2		protease inhibitor	Trypsin inhibitor	-1.00528	1.31984	0.049205	0.0113098	0.0883058	*		0.157323	-0.471886	1.9625	0.692387	1
Glycine max	C6TD56	x	glycolysis	Glyceraldehyde-3-phosphate dehydrogenase	-1.44888	0.119483	0.389764	0.0457192	0.220153	*		0.62704	0.702354	0.976113	0.998574	1
B. japonicum	G7D2E1	x	glycolysis	Oxidoreducatse	1.4312	-0.839553	4.25317	0.00310633	0.0442572	**		-0.106384	-0.485268	1.36005	0.847995	1
Glycine max	C6SVD7		glutathione S transferases	Phi class glutathione S-transferase	-1.26506	1.00037	0.448868	0.00104006	0.0207424	**		-0.294188	0.558876	0.767495	0.208224	1
Glycine max	Q2TUV6		glutathione S transferases	Glutathione S-transferase 2	-0.374984	-0.435857	1.09613	0.999419	1			1.48724	-0.676402	6.50985	0.00309169	0.286699	**
Glycine max	I1J7M4	(X)	glutathione S transferases, peroxidases	Peroxidase	-0.814318	1.31245	0.0440524	3.15644e-05	0.00313384	***		-0.74419	0.246061	0.145146	0.012492	0.498202	*
Glycine max	I1L739	x	glutathione S transferases, peroxidases	Peroxidase	-0.786658	1.29885	0.257736	0.000249379	0.00945859	***		-0.786658	0.27447	0.405623	0.0262085	0.683398	*
Glycine max	I1N362	x	glutathione S transferases, peroxidases	Peroxidase	-0.718754	1.41832	0.00364153	0.000904819	0.020699	***		-0.686731	-0.0128338	0.05581	0.327547	1
B. japonicum	G7D991	x	glycolysis	Enolase	1.32954	-1.09503	3.83329	0.0292776	0.165098	*		-0.0636651	-0.170842	1.06021	0.998588	1
B. japonicum	G7DBM6	x	glycolysis	Oxidoreductase	1.33522	-1.02567	2.42255	0.0224833	0.137487	*		0.0873687	-0.396918	1.21163	0.873269	1
B. japonicum	G7DIF1		glycolysis	Glyceraldehyde 3-Phosphate Dehydrogenase	1.26133	-1.18139	3.14162	0.00603521	0.0604396	**		-0.111241	0.0312959	0.939431	0.99351	1
B. japonicum	G7DIF2	x	glycolysis	Phosphoglycerate kinase	1.39531	-0.930473	3.04381	0.0024198	0.0375748	**		-0.0333189	-0.431522	1.24326	0.825576	1
B. japonicum	G7DIH7	x	glycolysis	UTP--glucose-1-phosphate uridylyltransferase	1.10207	-1.2095	3.50783	0.0143488	0.104921	*		-0.344264	0.451693	0.69184	0.54494	1
Glycine max	I1KB94		minor CHO metabolism	Alpha-galactosidase	-0.60921	-0.60921	1	1	1			1.47968	-0.261265	2.00071	0.032757	0.707347	*
Glycine max	I1KQ93		glycolysis	Uncharacterized protein	-0.531968	-0.576585	1.04792	0.999853	1			1.49505	-0.386498	2.67829	0.0237167	0.649553	*
Glycine max	I1KWV4		gluco-, galacto- and mannosidases	Alpha-xylosidase	-1.48585	0.632425	0.377445	0.0349584	0.186457	*		0.308125	0.545299	0.928464	0.980201	1
Glycine max	I1LM73		glycolysis	UTP--glucose-1-phosphate uridylyltransferase	-1.36369	1.00452	0.31823	0.000900661	0.020699	***		-0.00316011	0.362332	0.870916	0.820413	1
Glycine max	I1MBR7	x	glycolysis	UTP--glucose-1-phosphate uridylyltransferase	-1.25538	0.907967	0.45245	0.0100744	0.0818799	*		0.69297	-0.345556	1.385	0.239295	1
Glycine max	I1ML97		gluco-, galacto- and mannosidases	Alpha-mannosidase	-1.04791	1.35995	0.250568	0.00495957	0.0552752	**		-0.112876	-0.199168	1.05218	0.998343	1
Glycine max	I1NAI7		glycolysis	Enolase	-1.29072	0.943089	0.47361	0.00621859	0.0613864	**		-0.264479	0.61211	0.775961	0.341836	1
Glycine max	C6TBN2		hormone metabolism	Probable aldo-keto reductase 1	-1.11506	1.30669	0.165381	0.000148394	0.00759558	***		-0.219969	0.0283359	0.847034	0.895265	1
Glycine max	C6THQ3	x	hormone metabolism	PREDICTED: IAA-amino acid hydrolase ILR1-like 4-like	1.3861	-0.814714	2.59638	0.00703945	0.0646971	**		0.0690739	-0.640462	1.45692	0.51604	1
Glycine max	I1JAQ7		hormone metabolism	Uncharacterized protein	-1.13036	1.2815	0.179523	0.017808	0.11832	*		-0.260784	0.109643	0.790451	0.934521	1
Glycine max	I1JRM5		hormone metabolism	Uncharacterized protein	-0.607563	1.48034	0.353292	0.00377318	0.0488734	**		-0.607563	-0.265211	0.769142	0.863013	1
Glycine max	I1KH67		hormone metabolism	Lipoxygenase	-0.845814	1.37763	0.0932023	0.0269097	0.154955	*		-0.616129	0.0843089	0.395473	0.681601	1
Glycine max	I1KUQ3		hormone metabolism	Lipoxygenase	-0.94412	1.39117	0.149029	0.0069586	0.0646971	**		-0.415052	-0.0319945	0.710047	0.888248	1
Glycine max	P38417		hormone metabolism	Lipoxygenase	-1.14086	1.28829	0.173637	0.00232914	0.0369064	**		0.0443792	-0.191809	1.16183	0.959961	1
Glycine max	C6T1E0		lipid metabolism	Uncharacterized protein	-0.440738	1.3383	0.419803	0.0182656	0.120084	*		-1.00191	0.104347	0.396251	0.133948	1
Glycine max	C6T2H1		lipid metabolism	PREDICTED: minor allergen Alt a 7 isoform	-1.23261	1.20378	0.125402	0.000188851	0.00793619	***		-0.110449	0.139277	0.854913	0.901812	1
Glycine max	C6T5S5		lipid metabolism	PutativeUncharacterized protein	1.39266	-0.628085	3.70919	0.034684	0.186457	*		0.0499799	-0.814557	2.54543	0.486072	1
B. japonicum	G7D6Y6	x	lipid metabolism	Glutaryl-CoA dehydrogenase	1.0855	-1.31585	2.28124	0.0408052	0.205813	*		0.293651	-0.0633021	1.11416	0.959187	1
B. japonicum	G7DDB8	x	lipid metabolism	Acetyl-coenzyme A carboxylase carboxyl transferase subunit alpha	1.29423	-0.856712	4.65645	0.0395931	0.203411	*		0.278884	-0.716403	2.36609	0.44124	1
B. japonicum	G7DJS1	x	lipid metabolism	3-oxoacyl-ACP reductase	1.2376	-1.20404	3.0359	0.00350448	0.0465691	**		0.078274	-0.111825	1.08296	0.981532	1
B. japonicum	G7DLN3	x	lipid metabolism	3-oxoacyl-(Acyl-carrier-protein) synthase II	1.25714	-1.19053	4.30378	0.00800762	0.0690552	**		-0.0342057	-0.0324025	0.99905	1	1
Glycine max	I1L692		lipid metabolism	Biotin carboxyl carrier protein of acetyl-CoA carboxylase,	-1.04502	1.36123	0.257702	0.00429384	0.0510831	**		-0.208122	-0.108087	0.943557	0.997277	1
B. japonicum	G7DC91	x	metal handling	Ferroxidase	1.30408	-1.12847	6.02507	0.000749327	0.0188286	***		-0.0153842	-0.160226	1.09973	0.985566	1
Glycine max	I1K6M2	(X)	stress	Uncharacterized protein	-0.753283	1.38237	0.0785479	0.00944838	0.0775666	**		-0.716873	0.087784	0.213525	0.422353	1
Glycine max	C6SZA3	x	metal handling binding, chelation and storage	Copper transport protein ATOX1	-1.0718	1.32235	0.175265	0.00229499	0.0368799	**		-0.314024	0.0634722	0.770387	0.855018	1
Glycine max	C6TCN5		metal handling binding, chelation and storage	Ferritin	1.49666	-0.54727	28.8478	2.0329e-09	2.46378e-06	***		-0.404588	-0.544803	2.84827	0.611672	1
Glycine max	I1J7H3		metal handling binding, chelation and storage	Ferritin	1.09108	-0.503083	2.60651	0.0493726	0.231298	*		-1.12574	0.537746	0.181815	0.0239705	0.649553	*
Glycine max	I1JIE1		metal handling binding, chelation and storage	Ferritin	1.43997	-0.750302	2.59599	0.00164552	0.0295339	**		-0.0941141	-0.595552	1.32836	0.635844	1
Glycine max	I1JL80		metal handling binding, chelation and storage	Ferritin	1.43757	-0.879815	9.73204	0.0245616	0.145061	*		-0.235443	-0.322311	1.10556	0.999057	1
Glycine max	I1NFR3		glycolysis	Fructose-bisphosphate aldolase	-1.22865	1.05496	0.275693	0.0101313	0.0818799	*		-0.338832	0.512521	0.673859	0.439274	1
Glycine max	C6SXJ9	x	mitochondrial electron transport, ATP synthesis	Cytochrome b-c1 complex subunit 7	0.948337	-0.981678	6.27432	0.0283438	0.160537	*		0.770464	-0.737123	3.4695	0.0676796	0.959442
B. japonicum	G7D1T4	x	mitochondrial electron transport, ATP synthesis	Electron transfer flavoprotein beta subunit	1.31556	-1.11362	3.59958	0.00786278	0.0687745	**		-0.034717	-0.167221	1.07045	0.995215	1
B. japonicum	G7D1T5	x	mitochondrial electron transport, ATP synthesis	Electron transfer flavoprotein large subunit	1.11006	-1.30584	2.46868	0.0217199	0.134004	*		-0.0494033	0.245181	0.907826	0.968288	1
B. japonicum	G7D7W9	x	mitochondrial electron transport, ATP synthesis	NADH-quinone oxidoreductase subunit C	1.40799	-0.945608	2.9214	0.0065014	0.0628317	**		-0.321955	-0.140432	0.910585	0.985774	1
B. japonicum	G7DCV3	x	mitochondrial electron transport, ATP synthesis	Electron transfer flavoprotein beta chain	1.25815	-0.849163	6.33505	0.00193229	0.0332031	**		0.348829	-0.757819	3.27547	0.0747875	1
B. japonicum	G7DEW6	x	mitochondrial electron transport, ATP synthesis	Electron transfer flavoprotein alpha chain	0.516202	-0.994769	5.16437	0.12722	0.406655			1.14191	-0.66334	3.60024	0.036224	0.735974	*
B. japonicum	G7DF99	x	mitochondrial electron transport, ATP synthesis	ATP synthase subunit beta	1.34013	-1.06049	4.21548	9.1196e-05	0.00656653	***		0.0021377	-0.281786	1.18614	0.830881	1
Glycine max	I1LHV3		mitochondrial electron transport, ATP synthesis	Uncharacterized protein	1.37634	-0.919879	2.03155	0.00247462	0.0379991	**		0.0504622	-0.506922	1.21122	0.629168	1
Glycine max	I1MWP7		mitochondrial electron transport, ATP synthesis	Cytochrome b-c1 complex subunit 7	1.43341	-0.812287	5.2004	8.20907e-06	0.00141812	***		-0.0953652	-0.52576	1.52413	0.350345	1
Glycine max	C6TCD2	x	N-metabolism	Glutamine synthetase	1.29395	-1.10718	3.50368	5.42374e-06	0.00117378	***		0.109604	-0.296368	1.22938	0.422194	1
B. japonicum	G7D356	x	N-metabolism	Glutamate synthase, small subunit	1.08596	-1.14837	2.59043	0.00772103	0.0679647	**		0.531202	-0.468789	1.47974	0.262944	1
B. japonicum	G7DCS6	x	N-metabolism	Nodulate formation efficiency C protein	1.40368	-0.938501	3.13016	0.0200962	0.126817	*		-0.0899309	-0.375248	1.17159	0.967245	1
B. japonicum	G7DEY3	x	N-metabolism	Nitrogen fixation protein	1.4703	-0.749924	17.8087	0.000907827	0.020699	***		-0.269744	-0.450632	1.41932	0.966753	1
B. japonicum	G7DEZ6	x	N-metabolism	Nitrogenase protein alpha chain	1.13719	-1.01043	3.45442	0.018723	0.122053	*		0.518771	-0.645526	1.93902	0.219352	1
Glycine max	K7L0W4	x	N-metabolism	Glutamine synthetase	-1.22516	1.15789	0.263165	0.00439806	0.0510831	**		-0.245662	0.312929	0.766202	0.701211	1
Glycine max	O82560		N-metabolism	Glutamine synthetase cytosolic isozyme 2	1.158	-1.26127	2.37155	0.000102003	0.00656653	***		0.22899	-0.125725	1.12234	0.73021	1
B. japonicum	G7D1Z5	x	not assigned	Two-component response regulator	1.33198	-0.987307	4.40461	0.00432121	0.0510831	**		0.137223	-0.481896	1.52175	0.611243	1
B. japonicum	G7D3N1	x	not assigned	Uncharacterized protein	1.48035	-0.721569	3.41607	0.00347599	0.0465691	**		-0.383437	-0.375344	0.993565	0.999998	1
B. japonicum	G7D7A1	x	not assigned	Uncharacterized protein	1.44496	-0.671442	4.2007	0.049168	0.231298	*		-0.102077	-0.671442	1.86107	0.823809	1
B. japonicum	G7D7M5	x	not assigned	3-demethylubiquinone-9 3-methyltransferase	1.48636	-0.668375	5.16695	0.00679542	0.0641256	**		-0.477813	-0.340168	0.837166	0.991925	1
B. japonicum	G7D7U4	x	not assigned	Trigger factor	1.30276	-1.06518	2.57376	0.00603082	0.0604396	**		0.145763	-0.383348	1.24199	0.75371	1
B. japonicum	G7D868	x	not assigned	Blr2525 protein	0.739057	-1.4593	2.82381	0.0183341	0.120084	*		0.180049	0.540197	0.887625	0.923086	1
B. japonicum	G7D8A3	x	not assigned	Uncharacterized protein	0.870678	-1.28343	2.74214	0.000350097	0.0118008	***		0.711129	-0.298379	1.45442	0.0507213	0.866521
B. japonicum	G7D8S4	x	not assigned	3-oxoadipate CoA-transferase subunit A	1.28611	-1.15649	2.43275	0.0403664	0.205097	*		-0.0705945	-0.0590243	0.995871	0.999999	1
B. japonicum	G7D951	x	not assigned	Bll4831 protein	1.49997	-0.504784	28.8722	0.0224758	0.137487	*		-0.490398	-0.504784	1.2	0.999993	1
B. japonicum	G7D9K7	x	not assigned	Uncharacterized protein	1.46138	-0.742353	6.87289	0.000142319	0.00756482	***		-0.194002	-0.525023	1.55862	0.735563	1
B. japonicum	G7DAN7	x	not assigned	Invasion associated locus B	1.42856	-0.896288	7.91025	0.0191861	0.123326	*		-0.181777	-0.350493	1.19124	0.992483	1
B. japonicum	G7DB88	x	not assigned	Dioxygenase	1.40846	-0.914076	4.03124	0.0166015	0.113376	*		-0.0761533	-0.418228	1.27105	0.939794	1
B. japonicum	G7DBD3	x	not assigned	Uncharacterized protein	0.752223	-0.905592	2.5217	0.103747	0.362067			0.971755	-0.818386	2.52138	0.0479874	0.862722	*
B. japonicum	G7DBD4	x	not assigned	Uncharacterized protein	1.48036	-0.714715	11.7186	0.00513803	0.0559115	**		-0.334835	-0.430811	1.19639	0.99705	1
B. japonicum	G7DBG2	x	not assigned	Uncharacterized protein	1.40476	-0.913967	5.45755	0.0170111	0.11468	*		-0.0571697	-0.433627	1.37626	0.922539	1
B. japonicum	G7DC14	x	not assigned	PrkA family serine protein kinase	-0.171394	-0.927746	1.79934	0.623439	1			1.41728	-0.318145	2.11544	0.0401733	0.771103	*
B. japonicum	G7DD20		not assigned	Sugar hydrolase	1.44324	-0.798314	3.10257	0.0139775	0.103299	*		-0.511903	-0.133027	0.781172	0.906759	1
B. japonicum	G7DD32	x	not assigned	acetyltransferase	1.20506	-1.08227	6.30845	0.0169217	0.114636	*		0.368132	-0.490919	1.84036	0.495761	1
B. japonicum	G7DDF9	x	not assigned	Polyhydroxyalkanoate synthesis repressor PhaR	1.34315	-1.05917	8.33519	0.00335749	0.045941	**		-0.0120158	-0.271966	1.2332	0.952499	1
B. japonicum	G7DDQ9	x	not assigned	Uncharacterized protein	1.4906	-0.359609	6.0288	0.0193978	0.123538	*		-0.497633	-0.633361	2.44129	0.99228	1
B. japonicum	G7DEP8	x	not assigned	VirK protein	0.912062	-1.38396	2.46846	0.00556613	0.0587206	**		-0.0300054	0.501901	0.845798	0.727134	1
B. japonicum	G7DER3		not assigned	Uncharacterized protein	1.27774	-1.16665	5.20219	0.0104366	0.0833724	*		-0.0472733	-0.0638093	1.00982	0.999992	1
B. japonicum	G7DEY6	x	not assigned	hypothetical protein	1.33897	-0.855077	7.20544	0.00108838	0.0211851	**		0.181674	-0.665571	2.56009	0.195108	1
B. japonicum	G7DFH5	x	not assigned	arylsulfate sulfotransferase	1.37462	-0.929486	4.37028	0.0454937	0.219833	*		-0.494036	0.0488975	0.673333	0.868025	1
B. japonicum	G7DGD6	x	not assigned	Oligosaccharide deacetylase	0.881807	-1.42781	2.32841	0.00441211	0.0510831	**		0.141246	0.404756	0.926212	0.950086	1
B. japonicum	G7DIQ2	x	not assigned	Uncharacterized protein	1.19925	-1.21591	3.32462	0.00655235	0.0628843	**		-0.195662	0.212313	0.834638	0.877015	1
B. japonicum	G7DKQ3	x	not assigned	Uncharacterized protein	1.49945	-0.52642	11.1528	0.00401006	0.050381	**		-0.462695	-0.510336	1.22094	0.999488	1
B. japonicum	G7DM94	x	not assigned	invasion associated locus B	1.45179	-0.661756	3.74951	0.000588533	0.0161208	***		-0.128281	-0.661756	1.694	0.470216	1
B. japonicum	G7DMT5	x	not assigned	benzoyl-CoA oxygenase	1.30864	-0.966451	2.72359	0.00647212	0.0628317	**		0.212881	-0.555073	1.44356	0.469535	1
B. japonicum	G7DP07	x	not assigned	Uncharacterized protein	1.49853	-0.442481	4.88873	0.01657	0.113376	*		-0.505523	-0.550523	1.11506	0.999729	1
B. japonicum	G7DP35	x	not assigned	Blr8224 protein	1.37452	-0.879303	14.0716	0.00091363	0.020699	***		0.0801896	-0.575406	2.37638	0.393806	1
B. japonicum	G7DP63	x	not assigned	Uncharacterized protein	1.443	-0.841311	5.17996	0.00770332	0.0679647	**		-0.180556	-0.421131	1.24887	0.967565	1
B. japonicum	G7DQ00	x	not assigned	Uncharacterized protein	1.49659	-0.490245	12.6019	0.00635076	0.0622464	**		-0.42096	-0.585383	3.16028	0.982404	1
B. japonicum	G7DQS3	x	not assigned	Uncharacterized protein	1.37564	-0.961949	3.80525	0.000594907	0.0161208	***		0.0130423	-0.426732	1.32135	0.690131	1
B. japonicum	G7DR87	x	not assigned	DSBA oxidoreductase	1.46066	-0.762635	4.28157	0.0166537	0.113376	*		-0.205393	-0.492629	1.30315	0.95807	1
B. japonicum	G7DRC7	x	not assigned	Uncharacterized protein	1.49768	-0.561141	7.37128	0.0363279	0.190171	*		-0.426399	-0.510144	1.22384	0.999015	1
Glycine max	I1JMC0		not assigned	Uncharacterized protein	0.811613	-1.3412	5.551	0.0242772	0.144097	*		0.713252	-0.183662	1.55006	0.458117	1
Glycine max	I1K380	x	not assigned	LysM domain-containing GPI-anchored protein 2	-1.35988	0.921417	0.427942	0.00836432	0.0709171	**		0.539853	-0.101392	1.21627	0.637973	1
Glycine max	I1KT36		not assigned	Uncharacterized protein	-1.26468	1.17838	0.299541	0.0227873	0.13752	*		-0.0211668	0.107467	0.946777	0.997311	1
Glycine max	I1LIF9		not assigned	upstream activation factor subunit UAF30-like	-0.589189	1.40277	0.370623	0.0142034	0.10441	*		0.0140013	-0.827583	1.90046	0.377295	1
Glycine max	I1LNL7		not assigned	Uncharacterized protein	-1.29861	0.191558	0.415013	0.04289	0.210647	*		1.12978	-0.0227271	1.49399	0.0990746	1
Glycine max	I1MEE5	x	not assigned	polyphenol oxidase family protein	-0.771437	0.214868	0.20882	0.336844	0.732041			-0.771437	1.32801	0.110316	0.00639745	0.39032	**
Glycine max	Q2KMJ4	x	not assigned	EKN	1.4205	-0.693686	4.44964	0.024966	0.146199	*		-0.0192864	-0.70753	2.14893	0.651217	1
Glycine max	Q7XJ87		not assigned	Glycinamide ribonucleotide transformylase	-0.292838	-0.791978	1.47363	0.799313	1			1.46398	-0.379168	2.2567	0.0133382	0.498202	*
Glycine max	C6TNK1		nucleotide metabolism	Uricase	-0.593923	-0.5653	0.977534	0.999962	1			1.4895	-0.330277	2.2059	0.0308852	0.705689	*
B. japonicum	G7D2M0	x	nucleotide metabolism	Inosine-5-monophosphate dehydrogenase	1.49011	-0.63428	12.9695	0.0399018	0.203485	*		-0.353624	-0.502206	1.47998	0.995314	1
B. japonicum	G7DGZ2	x	nucleotide metabolism	Inorganic pyrophosphatase	1.41306	-0.945399	5.49267	0.000253233	0.00945859	***		-0.242229	-0.225429	0.986505	0.999963	1
B. japonicum	G7DPF8	x	nucleotide metabolism	Acetylglutamate kinase	1.15528	-1.26532	3.12774	0.00341049	0.0462088	**		-0.1156	0.22564	0.870182	0.903755	1
Glycine max	I1ML44	x	nucleotide metabolism	Apyrase GS52	-0.866625	1.29782	0.364776	0.00725618	0.0646971	**		0.270033	-0.701224	1.68965	0.254716	1
Glycine max	P04670	x	nucleotide metabolism	Uricase-2 isozyme 1	-0.336327	-0.798535	1.528	0.879086	1			1.46333	-0.328468	2.33174	0.0355857	0.73402	*
Glycine max	C6TLX4	x	oxidases - copper, flavone etc	Uncharacterized protein	-1.12383	1.30103	0.106091	3.24878e-05	0.00313384	***		0.0310002	-0.208202	1.19877	0.861452	1
Glycine max	I1MEE6		oxidases - copper, flavone etc	Polyphenol oxidase A1, chloroplastic	-0.764437	0.302201	0.0982259	0.413013	0.815285			-0.82185	1.28409	0.0271495	0.0202503	0.62329	*
Glycine max	I1MLW9		oxidases - copper, flavone etc	Quinone oxidoreductase-like protein, chloroplastic	-1.10861	1.2164	0.226397	8.98157e-07	0.000310313	***		-0.431749	0.323961	0.642351	0.0161283	0.571519
Glycine max	C6T7R3	x	peroxidases	Peroxidase	-1.29301	1.04523	0.240122	0.0242943	0.144097	*		-0.196194	0.443981	0.741436	0.755363	1
Glycine max	C6TB83		peroxidases	Peroxidase	-0.813793	0.23464	0.0147149	0.208454	0.559116			-0.738766	1.31792	0.0422307	0.00317502	0.286699	**
Glycine max	C6TG83		peroxidases	Peroxidase	-1.39155	0.228738	0.252348	0.00794361	0.0690445	**		0.172015	0.990797	0.720479	0.182514	1
Glycine max	C6THQ0	x	peroxidases	Peroxidase	-1.14713	1.28894	0.0614913	0.000313553	0.0111049	***		-0.150505	0.00869644	0.878974	0.975272	1
Glycine max	I1JIB0	x	peroxidases	Peroxidase	-0.865845	0.840826	0.447498	0.0133267	0.100167	*		0.890863	-0.865845	2.27084	0.00595625	0.39032	**
Glycine max	I1JY99		peroxidases	Peroxidase	-1.28004	1.15664	0.164075	0.0343871	0.185636	*		-0.0279357	0.151343	0.90612	0.994117	1
Glycine max	I1LHW6		peroxidases	Peroxidase	-1.36516	0.968546	0.185235	0.00264429	0.0397219	**		-0.0462466	0.442859	0.790854	0.729965	1
Glycine max	I1MBJ1		peroxidases	Peroxidase	-1.46118	0.805718	0.341456	0.0111117	0.0874812	*		0.349776	0.305682	1.01499	0.999809	1
Glycine max	I1MVN5		peroxidases	Peroxidase	-1.28894	1.13239	0.146777	3.40142e-05	0.00313384	***		-0.0701645	0.226711	0.846352	0.769915	1
Glycine max	I1NH45		peroxidases	Peroxidase	-1.26289	0.842361	0.12904	1.42601e-06	0.000394148	***		-0.340701	0.761228	0.528289	0.000513184	0.118203
Glycine max	O23961	x	peroxidases	Peroxidase	-1.01553	0.404967	0.0464131	0.0151568	0.109384	*		-0.594252	1.20481	0.214203	0.00131501	0.177404	**
Glycine max	I1KW54		protease inhibitor	Alpha-amylase/subtilisin inhibitor	-0.794521	0.675343	0.0994487	0.0680008	0.278864			-0.916512	1.03569	0.0202397	0.00731423	0.39358	**
B. japonicum	G7DM95	x	protein	Peptidase	1.24811	-1.10715	2.73542	0.042983	0.210647	*		-0.391803	0.250845	0.763312	0.806587	1
B. japonicum	G7DKJ4	x	protein assembly and cofactor ligation	iron transporter	1.34886	-1.06575	2.53342	0.0492068	0.231298	*		-0.0932092	-0.189906	1.03946	0.999204	1
Glycine max	C6THR8	x	protein degradation	Uncharacterized protein	-0.997467	1.30233	0.392125	0.000100179	0.00656653	***		-0.514737	0.209876	0.730715	0.164333	1
B. japonicum	G7DD15	x	protein degradation	Peptidase	0.760035	-1.13697	4.44386	0.0302594	0.168569	*		0.916002	-0.539071	2.26668	0.0778115	1
B. japonicum	G7DF93	x	protein degradation	Carboxy-terminal protease	1.28298	-1.10309	2.76192	0.00492624	0.0552752	**		-0.335889	0.156002	0.811776	0.781766	1
B. japonicum	G7DH36	x	protein degradation	peptidase S16	1.47076	-0.756382	3.40637	0.0366306	0.190314	*		-0.288013	-0.426369	1.1102	0.996545	1
Glycine max	I1KTY6		protein degradation aspartate protease	Putative aspartic protease	0.364674	-1.03542	2.7164	0.0152435	0.109384	*		1.22137	-0.550619	2.36252	0.00133288	0.177404	**
Glycine max	I1MFJ1	x	protein degradation aspartate protease	Uncharacterized protein	1.31622	-0.961826	6.34762	0.0117356	0.0906067	*		0.196746	-0.551138	1.89387	0.558815	1
Glycine max	I1JT65	x	protein degradation cysteine protease	Cysteine proteinase RD19a	0.61789	-1.22696	2.18219	0.0388193	0.20018	*		0.985454	-0.376387	1.56482	0.111765	1
B. japonicum	G7D2M6	x	protein degradation serine protease	Serine protease D	1.18067	-0.905171	2.45409	0.0032817	0.0453531	**		-0.749607	0.474112	0.565092	0.0598865	0.954342
B. japonicum	G7D716	x	protein degradation serine protease	Serine protease D	-0.597579	-0.288873	0.602244	0.94754	1			-0.597579	1.48403	0.18337	0.00767708	0.39358	**
Glycine max	I1LIS1		protein degradation serine protease	ATP-dependent Clp protease proteolytic subunit	-0.297986	0.0224814	0.874073	0.968302	1			-1.06074	1.33624	0.3788	0.0131583	0.498202	*
Glycine max	I1MM56		protein degradation serine protease	Carboxypeptidase	-1.21122	1.14151	0.398567	0.00152515	0.0277336	**		-0.302399	0.372103	0.785359	0.454329	1
Glycine max	I1MUT1		protein degradation subtilases	Subtilisin-like protease SDD1	1.2283	-0.940222	2.64649	0.00948536	0.0775666	**		0.387829	-0.675906	1.67266	0.21824	1
Glycine max	Q9ZTT3		protein degradation subtilases	Subtilisin-like protease C1	-1.18802	1.02457	0.169527	0.0059235	0.0604396	**		-0.430877	0.594319	0.541093	0.2128	1
Glycine max	C6SZW2		protein degradation ubiquitin	Ubiquitin-conjugating enzyme E2 35	1.22094	-1.00559	6.04356	0.0041434	0.0508851	**		0.379613	-0.594963	2.14375	0.219524	1
Glycine max	C6T4F7		protein folding	Uncharacterized protein	0.526404	-0.65914	1.96014	0.450288	0.858342			1.13399	-1.00125	3.39201	0.0449561	0.82839	*
B. japonicum	G7DCT2		protein folding	10 kDa chaperonin	1.46115	-0.790801	7.80873	0.0295073	0.165098	*		-0.421775	-0.248571	0.801593	0.992754	1
Glycine max	I1LAL4		protein folding	Chaperonin CPN60-2, mitochondrial	-1.33262	1.09015	0.398063	0.0227713	0.13752	*		0.17736	0.065104	1.03742	0.99816	1
Glycine max	I1MQD0		protein folding	T-complex protein 1 subunit gamma	-0.705316	1.41599	0.465158	0.00461162	0.0526716	**		-0.705316	-0.00535888	0.724955	0.451197	1
Glycine max	I1ND96		protein postranslational modification	Uncharacterized protein	-1.07189	1.23256	0.448139	0.0370253	0.191644	*		-0.479671	0.319003	0.755175	0.65471	1
B. japonicum	G7D4Q0	x	protein synthesis	50S ribosomal protein L25	1.21277	-1.23221	2.99405	0.00136778	0.0258942	**		-0.063278	0.082726	0.942542	0.988068	1
B. japonicum	G7D4Y3	x	protein synthesis	50S ribosomal protein L1	1.23418	-1.08146	2.48888	0.0467499	0.223558	*		-0.460795	0.308076	0.738908	0.710302	1
B. japonicum	G7D4Y5	x	protein synthesis	50S ribosomal protein L10	1.41043	-0.945397	6.27912	0.000414495	0.012709	***		-0.16628	-0.298756	1.12122	0.985249	1
B. japonicum	G7D4Z3	x	protein synthesis	30S ribosomal protein S7	0.620636	-1.28304	3.66193	0.0325834	0.179403	*		0.943257	-0.280851	1.71279	0.168625	1
B. japonicum	G7D4Z5	x	protein synthesis	Elongation factor Tu	1.25507	-1.18987	2.16569	0.0028941	0.0425494	**		0.0260615	-0.0912675	1.03671	0.995172	1
B. japonicum	G7D501	x	protein synthesis	30S ribosomal protein S19	1.39222	-0.984691	3.53101	6.91606e-05	0.00576111	***		-0.136483	-0.27105	1.08142	0.974573	1
B. japonicum	G7D509	x	protein synthesis	50S ribosomal protein L5	1.29818	-1.05795	4.12216	0.0444909	0.216502	*		0.168512	-0.40874	1.41119	0.853079	1
B. japonicum	G7D511	x	protein synthesis	30S ribosomal protein S8	1.31523	-1.01483	2.33716	0.0155335	0.110089	*		-0.462591	0.162188	0.786002	0.727037	1
B. japonicum	G7D848	x	protein synthesis	30S ribosomal protein S2	1.24987	-1.11204	4.10364	5.94532e-06	0.00117378	***		0.240676	-0.378508	1.4143	0.119939	1
B. japonicum	G7D849	x	protein synthesis	Elongation factor Ts	0.843917	-1.32823	2.30779	0.0126202	0.096895	*		-0.208581	0.692894	0.755171	0.377455	1
B. japonicum	G7DFE8	x	protein synthesis	50S ribosomal protein L19	1.13236	-1.20639	2.91328	0.0115026	0.0893071	*		0.39732	-0.323296	1.34226	0.604621	1
B. japonicum	G7DGY5	x	protein synthesis	GTP-binding tyrosine phosphorylated protein	1.43458	-0.890569	2.04037	0.0428598	0.210647	*		-0.293151	-0.25086	0.985288	0.999919	1
B. japonicum	G7DIG8	x	protein synthesis	50S ribosomal protein L31	1.47229	-0.733713	4.09807	0.0365438	0.190314	*		-0.472472	-0.266102	0.825061	0.988486	1
B. japonicum	G7DJ39	x	protein synthesis	30S ribosomal protein S15	1.48516	-0.600668	2.72576	0.0277943	0.158903	*		-0.296725	-0.587762	1.23825	0.958724	1
Glycine max	I1JXC1		protein synthesis	Elongation factor Tu	1.49836	-0.445123	6.31897	0.0174054	0.116204	*		-0.49404	-0.559198	1.25927	0.999203	1
Glycine max	I1L3W4	x	protein synthesis	Eukaryotic translation initiation factor 3 subunit J	-1.23907	0.645007	0.307574	0.00253172	0.0384487	**		-0.363358	0.957418	0.564587	0.0180858	0.609624
Glycine max	I1J582	x	protein synthesis, hormone metabolism	Eukaryotic translation initiation factor 3 subunit I	-1.03894	1.27263	0.329752	0.0247354	0.145465	*		-0.486793	0.253107	0.695427	0.661696	1
Glycine max	C6SX42		redox	Glutaredoxin-C5	1.01198	-1.24073	2.67098	0.00922029	0.0763021	**		0.567324	-0.338575	1.40257	0.366084	1
Glycine max	C6T073	x	redox	Peroxiredoxin-2F, mitochondrial	-0.974111	1.21634	0.441833	0.00699293	0.0646971	**		-0.641831	0.399606	0.664877	0.210596	1
Glycine max	C6T265	x	redox	Uncharacterized protein	-1.03906	1.0021	0.39322	0.0253942	0.148079	*		-0.658085	0.695038	0.557348	0.128362	1
B. japonicum	G7D253	x	redox	Superoxide dismutase	1.48383	-0.691271	8.65059	0.00208424	0.0347039	**		-0.340143	-0.45242	1.21462	0.993264	1
B. japonicum	G7D588	x	redox	Anti-oxidant protein	1.42789	-0.905981	3.58397	0.0341385	0.185018	*		-0.215534	-0.306378	1.06045	0.999107	1
B. japonicum	G7DCU9	x	redox	Uncharacterized protein	1.13437	-0.987465	4.48935	0.000958265	0.0207424	***		0.529599	-0.676499	2.31233	0.0322295	0.707003	*
B. japonicum	G7DEW2	x	redox	Alkyl hydroperoxide reductase	1.24856	-1.19437	5.77169	0.0189536	0.122401	*		-0.108074	0.0538838	0.90799	0.994203	1
B. japonicum	G7DEY9	x	redox	Ferredoxin	1.35012	-1.0211	5.34586	0.0208497	0.129794	*		0.0359937	-0.365018	1.3337	0.920718	1
Glycine max	I1JUQ9		redox	Group 2 hemoglobin yjbI	1.04933	-0.921974	8.50343	0.00416065	0.0508851	**		0.6577	-0.785053	4.61012	0.020454	0.62329	*
Glycine max	I1LCI3		redox	Superoxide dismutase	-0.344108	-0.899496	1.80568	0.736937	1			1.42779	-0.184182	2.14759	0.0285502	0.702071	*
Glycine max	I1NIP8		redox	GDP-mannose 3,5-epimerase	-1.28133	1.10172	0.469592	0.0137162	0.102462	*		0.343068	-0.163452	1.15693	0.832637	1
Glycine max	K7LKG1		redox	Leghemoglobin C2	1.44688	-0.794018	28.8052	0.00907788	0.0755761	**		-0.149009	-0.503854	1.95708	0.907323	1
Glycine max	P02235	x	redox	Leghemoglobin C1	1.4633	-0.781286	10.8017	0.0010456	0.0207424	**		-0.252176	-0.429835	1.30607	0.970713	1
Glycine max	P02236		redox	Leghemoglobin C2	1.40634	-0.960378	6.75615	0.00539256	0.0577715	**		-0.207938	-0.23802	1.02654	0.999928	1
Glycine max	P02237		redox	Leghemoglobin C3	1.40465	-0.917688	8.72849	0.00057254	0.0161208	***		-0.0614687	-0.42549	1.45922	0.790395	1
Glycine max	P02238		redox	Leghemoglobin A	1.4582	-0.739631	10.9059	0.0131435	0.099804	*		-0.174312	-0.544257	1.88663	0.905519	1
Glycine max	Q43758		redox	Ascorbate peroxidase	1.24603	-1.1639	2.43137	0.00105063	0.0207424	**		0.170324	-0.252452	1.16291	0.767851	1
B. japonicum	G7DRE7	x	redox, transport	Glutaredoxin	1.49031	-0.654065	16.9957	0.0111409	0.0874812	*		-0.390606	-0.445641	1.16069	0.999562	1
B. japonicum	G7D1Z3	x	RNA	RNA polymerase sigma factor	1.41583	-0.805918	4.25047	0.00187182	0.032745	**		-0.022166	-0.587743	1.62724	0.568825	1
B. japonicum	G7D4Y1	x	RNA	Transcription termination/antitermination protein NusG	1.38718	-0.979341	2.7136	0.00186212	0.032745	**		-0.333268	-0.0745699	0.886824	0.940438	1
B. japonicum	G7D521	x	RNA	DNA-directed RNA polymerase subunit alpha	1.45997	-0.802715	4.52497	0.0137902	0.102462	*		-0.264839	-0.392418	1.12125	0.995847	1
B. japonicum	G7DJ44	x	RNA	Transcription termination/antitermination protein NusA	1.40811	-0.899438	2.82416	0.000494799	0.0145492	***		-0.452924	-0.0557438	0.811645	0.732169	1
B. japonicum	G7DJ49	x	RNA	Uncharacterized protein	1.25553	-1.00831	8.00952	0.00510021	0.0559115	**		-0.55744	0.31022	0.47142	0.339535	1
Glycine max	I1J8V4	x	RNA, development	PREDICTED: U1 small uclear ribonucleoprotein 70 kDa-like	-1.12168	1.22008	0.408799	0.00442621	0.0510831	**		-0.401624	0.303221	0.76846	0.521502	1
Glycine max	I1JMQ3		RNA	Uncharacterized protein	-0.883487	1.3598	0.332198	0.00843006	0.0710386	**		-0.596603	0.120294	0.661793	0.542843	1
Glycine max	I1JSF3	x	RNA	Uncharacterized protein	-1.11321	1.09887	0.313098	0.00151152	0.0277336	**		-0.518725	0.53307	0.603781	0.102543	1
Glycine max	I1JWB8		RNA	Uncharacterized protein	-1.16191	1.04249	0.35587	0.0303717	0.168569	*		-0.467564	0.586984	0.644549	0.375462	1
Glycine max	I1KJK0	x	RNA	Uncharacterized protein	-1.04711	1.33488	0.277457	0.00114349	0.0219487	**		-0.344194	0.0564239	0.801499	0.793804	1
Glycine max	I1KP85		RNA	Uncharacterized protein	1.05843	-1.05482	2.88819	0.0182148	0.120084	*		0.6175	-0.621115	1.79762	0.166676	1
Glycine max	I1NI06		RNA	RNA-binding protein Musashi like 2	-1.25978	0.68086	0.362125	0.0030875	0.0442572	**		-0.335765	0.914684	0.61832	0.0348662	0.73236
Glycine max	K7LKA7	x	RNA	RNA-binding protein Musashi like 2	-1.11519	1.31422	0.391312	0.0338458	0.184153	*		-0.0310492	-0.167984	1.05458	0.997301	1
Glycine max	K7LP96	x	RNA	Glycine-rich RNA-binding protein	-0.433599	1.41289	0.489494	0.0197473	0.125187	*		-0.89967	-0.0796172	0.613995	0.378148	1
Glycine max	Q8SAG1		S-assimilation	ATP sulfurylase	-1.01713	0.111283	0.226923	0.118166	0.39256			1.33121	-0.425359	2.9031	0.00566279	0.39032	**
Glycine max	C6T4W1		secondary metabolism	PutativeUncharacterized protein (Fragment)	0.711204	-1.18689	2.81952	0.000848261	0.0206951	***		0.935103	-0.459417	1.78757	0.005335	0.39032
B. japonicum	G7D524	x	secondary metabolism	D-beta-hydroxybutyrate dehydrogenase	1.37821	-0.916481	3.84009	0.00597748	0.0604396	**		0.0466282	-0.508357	1.45637	0.706935	1
Glycine max	I1K7Q8		secondary metabolism	Isoflavone reductase like	-1.03108	1.27992	0.357679	0.0110339	0.0874812	*		-0.490281	0.24144	0.714106	0.5797	1
Glycine max	I1KQ26		secondary metabolism	Uncharacterized protein	-1.2436	0.755566	0.135832	3.13704e-05	0.00313384	***		-0.373846	0.861876	0.489309	0.00141205	0.177404	**
Glycine max	I1KQ30		secondary metabolism	Aldehyde dehydrogenase family 2 member C4	-1.28939	1.12544	0.231759	0.00355395	0.0467768	**		-0.0874714	0.251422	0.850662	0.906169	1
Glycine max	I1L1I7		secondary metabolism	Tryptophan aminotransferase-related protein 4	-0.41944	-0.398354	0.959337	0.999987	1			-0.670684	1.48848	0.102366	0.0153753	0.559175	*
Glycine max	I1L6V5		secondary metabolism	Uncharacterized protein	-0.78462	0.266218	0.583735	0.302276	0.69278			-0.78462	1.30302	0.413789	0.00768933	0.39358	**
Glycine max	I1LHU4		secondary metabolism	PREDICTED: isoflavone reductase-like protein-like	-1.05133	1.27466	0.067911	0.00443558	0.0510831	**		-0.461675	0.238338	0.520254	0.521819	1
Glycine max	I1N3E5		secondary metabolism	Uncharacterized protein	-1.05995	0.847209	0.125752	0.00197008	0.0332031	**		-0.647325	0.860066	0.313056	0.00641721	0.39032	**
Glycine max	I1N520		secondary metabolism	Uncharacterized protein	-0.855407	0.408975	0.141511	0.153871	0.463124			-0.777126	1.22356	0.125339	0.00827028	0.408197	**
Glycine max	K7LNG5		secondary metabolism	NADPH:isoflavone reductase	-0.964497	0.706719	0.151649	0.0642283	0.268578			-0.747772	1.00555	0.2272	0.0315661	0.705689	*
Glycine max	O48601		secondary metabolism	NADPH:isoflavone reductase	-0.916482	0.821421	0.00820831	0.0278253	0.158903	*		-0.812937	0.907998	0.0641309	0.0174984	0.604569	*
Glycine max	Q53B75		secondary metabolism	Chalcone--flavonone isomerase 1B-1	-0.965069	1.21061	0.0685185	0.0129456	0.0988442	*		-0.657991	0.412451	0.303804	0.247917	1
Glycine max	Q93XE6		secondary metabolism	Chalcone--flavonone isomerase 1A	-0.869135	1.00031	0.133257	0.00085356	0.0206951	***		-0.85152	0.720346	0.162519	0.00183212	0.210999	**
Glycine max	P26690		secondary metabolism, stress	NAD(P)H-dependent 6'-deoxychalcone synthase	-0.890265	1.02986	0.0465985	0.0294119	0.165098	*		-0.82381	0.684214	0.0960861	0.0679629	0.959442
B. japonicum	G7DBG0	x	short chain dehydrogenase/reductase (SDR)	MULTISPECIES: 3-alpha-hydroxysteroid dehydrogenase	1.42473	-0.894236	6.21364	0.000158895	0.00766833	***		-0.143202	-0.387288	1.25646	0.889929	1
Glycine max	I1KIE5		short chain dehydrogenase/reductase (SDR)	Uncharacterized protein	-0.946753	0.912697	0.309759	0.0265443	0.15349	*		-0.77986	0.813916	0.38586	0.0395129	0.771103	*
B. japonicum	G7D7U0	x	signalling	Nitrogen regulatory protein PII	1.44361	-0.768811	12.5922	0.0335111	0.183053	*		-0.116898	-0.557902	2.09767	0.900876	1
B. japonicum	G7DH53	x	signalling	Nitrogen regulatory protein PII	1.34731	-1.00307	10.6042	0.0039981	0.050381	**		0.0721576	-0.416403	1.58764	0.763541	1
B. japonicum	G7DKK7	x	signalling	Pirin	1.45719	-0.819679	3.35519	0.0157902	0.110772	*		-0.346364	-0.291144	0.963071	0.999683	1
Glycine max	I1LHD6		signalling	PI-PLC X domain-containing protein	-1.182	1.26343	0.459257	0.0397451	0.203436	*		-0.0813517	-7.95177e-05	0.975061	0.999486	1
Glycine max	I1NC93	x	signalling	Uncharacterized protein	-1.37801	0.954858	0.37319	0.0040882	0.0508851	**		-0.0118226	0.434972	0.860461	0.80534	1
Glycine max	I1NH59		signalling	Uncharacterized protein	-0.571013	1.43207	0.284165	0.0281183	0.159915	*		-0.785787	-0.0752677	0.449598	0.604131	1
Glycine max	K7MZX4		signalling	Uncharacterized protein	-0.996475	1.3551	0.190675	0.0162093	0.112006	*		-0.410001	0.0513743	0.711978	0.870957	1
Glycine max	C6SWY6		stress	Protein LlR18B	-0.893036	1.31742	0.205148	0.000189504	0.00793619	***		-0.646269	0.221888	0.484905	0.0876249	1
Glycine max	C6SXD0	x	stress	Uncharacterized protein	-0.67702	0.126932	0.289079	0.57596	0.972389			1.36459	-0.814505	12.5039	0.0094747	0.451519	**
Glycine max	I1L927		stress	Thaumatin-like protein 1a	-0.695221	1.42552	0.13209	0.00104725	0.0207424	**		-0.695221	-0.0350786	0.328377	0.351214	1
Glycine max	C6SYE7	x	stress	Uncharacterized protein	-1.08851	1.05675	0.180108	0.042148	0.210647	*		0.60661	-0.57485	2.19956	0.309219	1
Glycine max	I1LEI5		stress	Uncharacterized protein	-0.965621	0.322858	0.145111	0.232606	0.602114			-0.61584	1.2586	0.232708	0.031659	0.705689	*
Glycine max	C6T432		stress	PutativeUncharacterized protein	0.717693	-1.21253	3.8431	0.000653028	0.0167966	***		0.915349	-0.420515	1.90818	0.00670048	0.39032
Glycine max	C6TAE1		stress	PutativeUncharacterized protein	-0.738926	1.37766	0.419469	0.00041948	0.012709	***		-0.738926	0.100196	0.645714	0.120193	1
Glycine max	C6TF90		stress	PutativeUncharacterized protein	-0.897026	1.01756	0.168504	0.00017741	0.00793619	***		-0.819427	0.69889	0.234685	0.000706544	0.139492	***
Glycine max	C7S8C5		stress	Germin-like protein 11	-0.628422	1.47114	0.191582	0.000106849	0.00656653	***		-0.628422	-0.214294	0.545758	0.525658	1
Glycine max	I1MI59	x	protease inhibitor	Uncharacterized protein	-0.784744	1.3053	0.00155639	1.60084e-07	7.37451e-05	***		-0.78224	0.261689	0.00548874	0.000134102	0.0370659	***
Glycine max	G7D5V1	x	stress	DNA-binding stress response protein, Dps family	1.49993	-0.497524	5.0282	0.00194822	0.0332031	**		-0.512628	-0.489781	0.954633	0.999923	1
Glycine max	I1J7J5		stress	Pathogenesis-related protein	-1.01812	0.935117	0.0289939	1.2128e-05	0.00186232	***		-0.695233	0.778233	0.205538	9.56483e-05	0.0330465	***
Glycine max	I1JL55		stress	Uncharacterized protein	-0.708459	0.00406417	0.678513	0.741674	1			-0.708459	1.41285	0.41483	0.0257852	0.683398	*
Glycine max	I1MV71	x	cell wall	Uncharacterized protein	-0.776569	1.27695	0.0281878	3.56553e-09	2.46378e-06	***		-0.816387	0.316011	0.017138	1.64548e-06	0.00227405	***
Glycine max	K7KJM5	x	metal handling	Polyphenol oxidase A1, chloroplastic	-0.71927	0.0371391	0.325268	0.695376	1			-0.71927	1.4014	0.146719	0.0232413	0.649553	*
Glycine max	Q9XFI8		peroxidases	Peroxidase (Fragment)	-0.882104	0.570458	0.0708574	0.000932006	0.0207424	***		-0.805403	1.11705	0.0888536	2.62516e-05	0.0181398	***
Glycine max	I1M4R0		stress	Uncharacterized protein	1.22597	-1.04755	4.50552	7.08675e-05	0.00576111	***		0.348814	-0.527236	1.74949	0.060078	0.954342
Glycine max	I1ME54		stress	Uncharacterized protein	-0.661243	-0.129653	0.75	0.783229	1			-0.661243	1.45214	0.430072	0.00626417	0.39032	**
Glycine max	I1MIB4		stress	Uncharacterized protein	1.44523	-0.731313	5.20598	0.000423019	0.012709	***		-0.110321	-0.603594	1.76452	0.528292	1
Glycine max	I1N7M4		stress	Germin-like protein subfamily 1 member 7	-0.896086	1.34536	0.123622	0.00484684	0.0549044	**		-0.602859	0.153581	0.446175	0.438032	1
Glycine max	I1NH01		stress	Acidic endochitinase	-0.0879633	-0.772128	1.73848	0.745256	1			1.43657	-0.576484	2.79401	0.0287213	0.702071	*
Glycine max	K7K8V1	x	stress	PREDICTED: MLP-like protein 34	-1.14446	0.980724	0.32087	0.0319195	0.176451	*		0.679774	-0.516036	1.73249	0.255342	1
Glycine max	P05478		stress	18.5 kDa class I heat shock protein	-0.409852	0.27511	0.772517	0.803575	1			-1.10465	1.23939	0.410353	0.0230487	0.649553	*
Glycine max	P26987		stress	Stress-induced protein SAM22	-0.760577	1.36139	0.0218849	0.0133363	0.100167	*		-0.740665	0.139853	0.0710935	0.384287	1
Glycine max	I1MYW6		stress, redox	Gamma-glutamyltranspeptidase 1	-0.706027	1.37116	0.32955	0.0103364	0.0830517	*		-0.779918	0.114786	0.514229	0.32401	1
Glycine max	Q43453	x	stress, RNA	Stress-induced protein SAM22	-0.915685	1.08164	0.0133767	0.0349232	0.186457	*		-0.782194	0.616242	0.102996	0.128297	1
B. japonicum	G7DBE1	x	TCA, org transformation	Acetyltransferase	1.44375	-0.837251	3.7741	3.00393e-05	0.00313384	***		-0.179375	-0.427121	1.20103	0.821569	1
B. japonicum	G7DFB9		TCA, org transformation	Malate dehydrogenase	1.06231	-1.34329	3.2989	0.000390991	0.0125663	***		0.257942	0.0230382	1.09736	0.929379	1
Glycine max	I1JBV5		TCA, org transformation	Pyruvate dehydrogenase E1 component subunit alpha	-1.449	0.847072	0.369503	8.40458e-05	0.00645285	***		0.330327	0.271597	1.01915	0.997641	1
Glycine max	I1K547		TCA, org transformation	Succinate-semialdehyde dehydrogenase	-1.16929	1.1113	0.446417	0.00530948	0.0573258	**		0.47401	-0.416019	1.34332	0.329348	1
Glycine max	I1KDM8		TCA, org transformation	Malate dehydrogenase	1.37087	-0.780618	3.23548	0.0259442	0.150651	*		0.115457	-0.705708	1.79161	0.537754	1
Glycine max	I1KXM1		TCA, org transformation	Pyruvate dehydrogenase E1 component subunit alpha	0.0316819	-0.244348	1.08875	0.989137	1			1.31395	-1.10128	2.07185	0.0480677	0.862722	*
Glycine max	I1NAC8		TCA, org transformation	PREDICTED: bifunctional monodehydroascorbate reductase and carbonic anhydrase	-0.869955	0.28643	0.414899	0.245349	0.616496			-0.705956	1.28948	0.330263	0.0121192	0.498202	*
Glycine max	Q9SPB8		TCA, org transformation	Malate dehydrogenase	1.20684	-1.01419	2.01345	0.00378397	0.0488734	**		0.401868	-0.594518	1.38158	0.195397	1
B. japonicum	G7D458	x	TCA, org transformation, amino acid metabolism, secondary metabolism	Tartrate dehydrogenase	1.06427	-1.27781	2.93114	0.0488636	0.231265	*		-0.218598	0.432135	0.777355	0.809254	1
B. japonicum	G7D3B0	x	TCA, org transformation, secondary metabolism	Aldehyde dehydrogenase	1.36673	-0.99956	2.39068	0.00804478	0.0690552	**		-0.00257639	-0.364592	1.15494	0.911476	1
B. japonicum	G7D4F4	x	TCA, org transformation, secondary metabolism	Aldehyde dehydrogenase	1.2947	-1.14084	3.10647	0.00300623	0.0437328	**		-0.149023	-0.0048389	0.937098	0.991178	1
Glycine max	C6TGZ7	x	transport	VDAC1.3	-1.23206	1.1962	0.421668	0.00504253	0.0557502	**		0.176821	-0.140955	1.11105	0.930865	1
B. japonicum	G7DKN9	x	transport	MFS transporter	1.47086	-0.751468	5.81828	3.33451e-05	0.00313384	***		-0.278702	-0.440686	1.20982	0.937502	1
Glycine max	K7L827		transport	PREDICTED: V-type proton ATPase subunit D	-0.186675	-0.639385	1.2514	0.924107	1			1.46544	-0.639385	2.16885	0.0349752	0.73236	*
B. japonicum	G7D2G6	x	transport ABC	ABC transporter substrate-binding protein	1.39853	-0.972075	2.04634	0.00103484	0.0207424	**		-0.148998	-0.277458	1.04339	0.990125	1
B. japonicum	G7D3B8	x	transport ABC	ABC transporter amino-acid-binding protein	1.28083	-1.1628	3.30695	0.0193259	0.123538	*		-0.0733058	-0.0447178	0.98687	0.999968	1
B. japonicum	G7D3C1	x	transport ABC	Amino acid ABC transporter ATP-binding protein	1.33696	-1.08418	3.34925	0.000648821	0.0167966	***		-0.075611	-0.17717	1.05241	0.994566	1
B. japonicum	G7D7K9	x	transport ABC	C4-dicarboxylate ABC transporter substrate-binding protein	1.22033	-1.12532	3.31564	0.00321951	0.044943	**		0.298863	-0.393868	1.39711	0.504104	1
B. japonicum	G7DAT2	x	transport ABC	ABC transporter substrate-binding protein	1.26282	-1.16189	2.99605	0.0188386	0.12223	*		0.107971	-0.2089	1.14618	0.958966	1
B. japonicum	G7DCQ3	x	transport ABC	Amino acid ABC transporter ATP-binding protein	1.20899	-0.821551	5.55476	0.0239065	0.143025	*		0.434116	-0.821551	3.81662	0.160808	1
B. japonicum	G7DKT9	x	transport ABC	ABC transporter substrate-binding protein	1.13879	-1.2257	2.54685	0.000223474	0.00882403	***		-0.270434	0.357339	0.798249	0.344437	1
B. japonicum	G7DL57	x	transport ABC	ABC transporter substrate-binding protein	1.37138	-0.99041	3.29766	0.0460087	0.220778	*		-0.371929	-0.00903711	0.819392	0.957929	1
B. japonicum	G7DLF8	x	transport ABC	ABC transporter substrate-binding protein	1.25403	-1.18811	2.97457	0.000125598	0.00694305	***		0.0495696	-0.115495	1.07147	0.964512	1
B. japonicum	G7DPD9	x	transport ABC	ABC transporter substrate-binding protein	1.07607	-1.27384	3.53719	0.0453561	0.219833	*		0.414988	-0.217224	1.31885	0.817281	1
Glycine max	G7DPL7	x	transport ABC	Phosphonates-binding periplasmic protein	1.49085	-0.572068	2.10543	0.00582759	0.0604396	**		-0.341053	-0.577733	1.12721	0.954193	1
B. japonicum	G7DPQ8	x	transport ABC	ABC transporter substrate-binding protein	1.43031	-0.85766	2.47379	0.00615606	0.0612063	**		-0.451678	-0.120967	0.85553	0.916049	1
B. japonicum	G7DRU6	x	transport ABC	C4-dicarboxylate ABC transporter substrate-binding protein	1.34331	-1.07542	3.2475	0.00222906	0.036242	**		-0.173352	-0.094531	0.961683	0.998314	1
